# Supplementary figures and images for: Preparation, structural diversity and characterization of a family of Cd(ii)–organic frameworks
Source: Royal Society of Chemistry journal article supplement (doi:10.1039/c3dt51118a), 2013-01-01

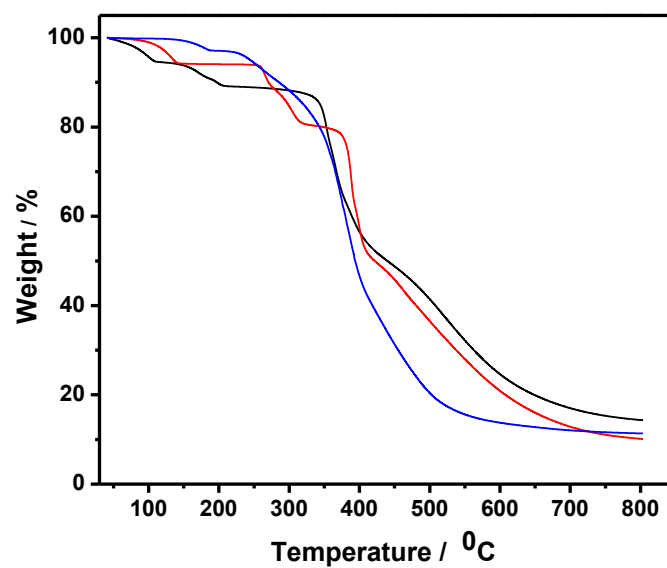

**Fig. S1** TG curves of the rehydrated materials of **1** (red), **2** (blue) and **3** (black).

Supplement: c3dt51118a.pdf [file c3dt51118a.pdf]
